# Supplementary material for: Characteristic Metabolic Changes of the Crust from Dry-Aged Beef Using 2D NMR Spectroscopy
Source: Molecules. 2020 Jul 7;25(13):3087. doi: 10.3390/molecules25133087 (PMC7411603; doi:10.3390/molecules25133087)

# Supplementary Material

## Characteristic Metabolic Changes of the Crust from Dry-aged Beef Using 2D NMR spectroscopy

Hyun Cheol Kim <sup>1</sup>, Ki Ho Baek <sup>1</sup>, Yoon-Joo Ko <sup>2</sup>, Hyun Jung Lee <sup>1</sup>, Dong-Gyun Yim <sup>1,\*</sup> and Cheorun Jo <sup>1,3,\*</sup>

<sup>1</sup> Department of Agricultural Biotechnology, Center for Food and Bioconvergence, and Research Institute of Agriculture and Life Science, Seoul National University, Seoul 08826, Korea; eoenhc@naver.com (H.C.K.); kihoback@naver.com (K.H.B.); leehj0113@snu.ac.kr (H.J.L.)

<sup>2</sup> National Center for Inter-University Research Facilities, Seoul National University, Seoul 08826, Korea; yjko@snu.ac.kr

<sup>3</sup> Institute of Green Bio Science and Technology, Seoul National University, Pyeongchang 25354, Korea

\* Correspondence: tousa0994@naver.com (D.-G.Y.); cheorun@snu.ac.kr (C.J.); Tel.: +82-2-880-4820 (D.-G.Y.); Tel.: +82-2-880-4804 (C.J.)

Figure S1. Partial least square-discriminant analysis (PLS-DA) cross validation from quantified metabolites of beef aged by different method and crust. Validation was evaluated (a) overall groups, (b) dry- and wet-aged beef, (c) crust and dry-aged beef, and (d) crust and wet-aged beef.

(a) Overall model

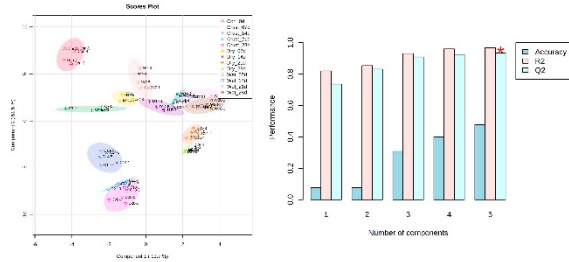

(b) Dry- and wet-aged beef

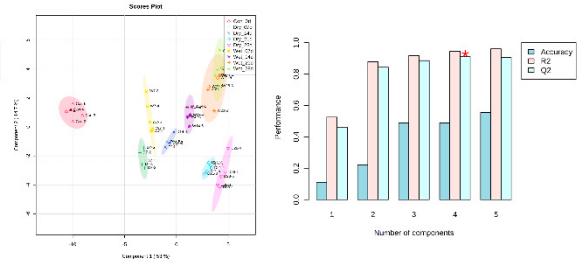

(c) Crust and dry-aged beef

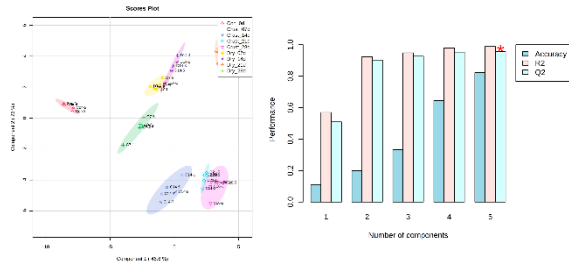

(d) Crust and wet-aged beef

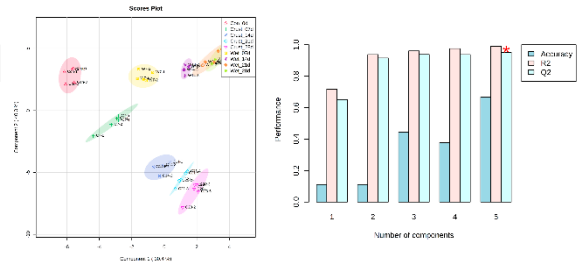

Figure S2. Representative  $^1\text{H}$ - $^{13}\text{C}$  hetero nuclear single quantum coherence (HSQC) NMR spectrum from 28 day-aged crust of dry aging extracts acquired using a 850 MHz cryo-NMR spectrometer and metabolites list of pattern integration for 2D qNMR analysis.

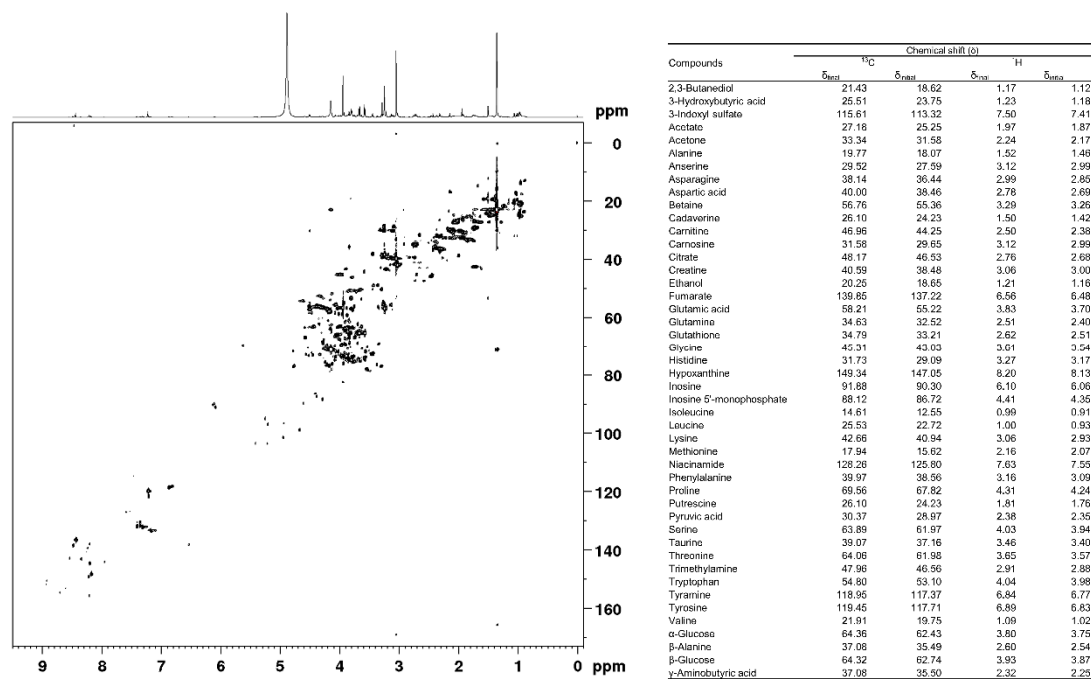

Figure S3. Standard curves of quantification from  $^1\text{H}$ - $^{13}\text{C}$  hetero nuclear single quantum coherence (HSQC) based on the 1D  $^1\text{H}$  quantitative NMR using a 850 MHz cryo-NMR spectrometer.

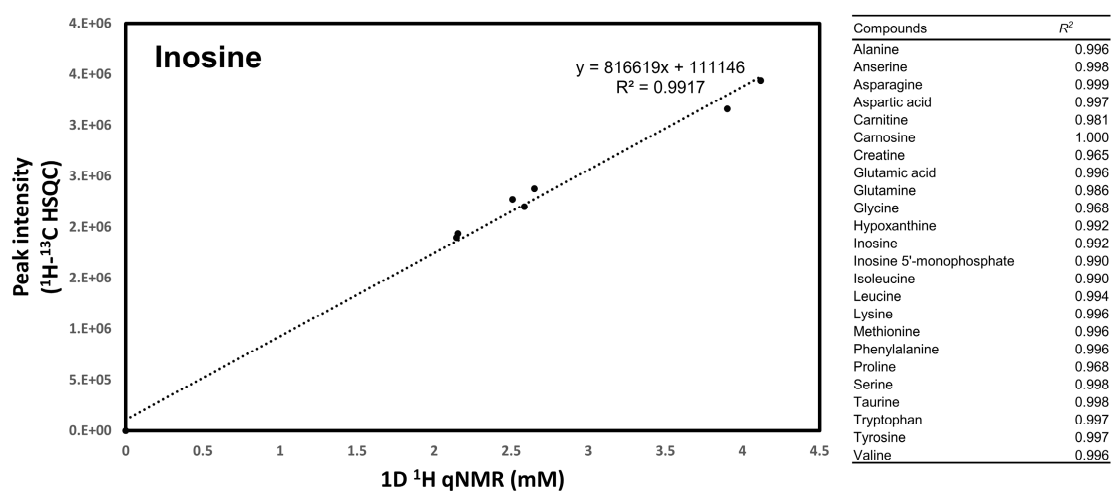

Supplement: Supplementary file 1 [file molecules-25-03087-s001.pdf]
